# Supplementary material for: Genome Duplication and Gene Loss Affect the Evolution of Heat Shock Transcription Factor Genes in Legumes
Source: PubMed Central journal article supplement (PMC4105503; doi:10.1371/journal.pone.0102825), 2014-07-21
Supplement: pone.0102825.s001.pdf [file pone.0102825.s001.pdf]

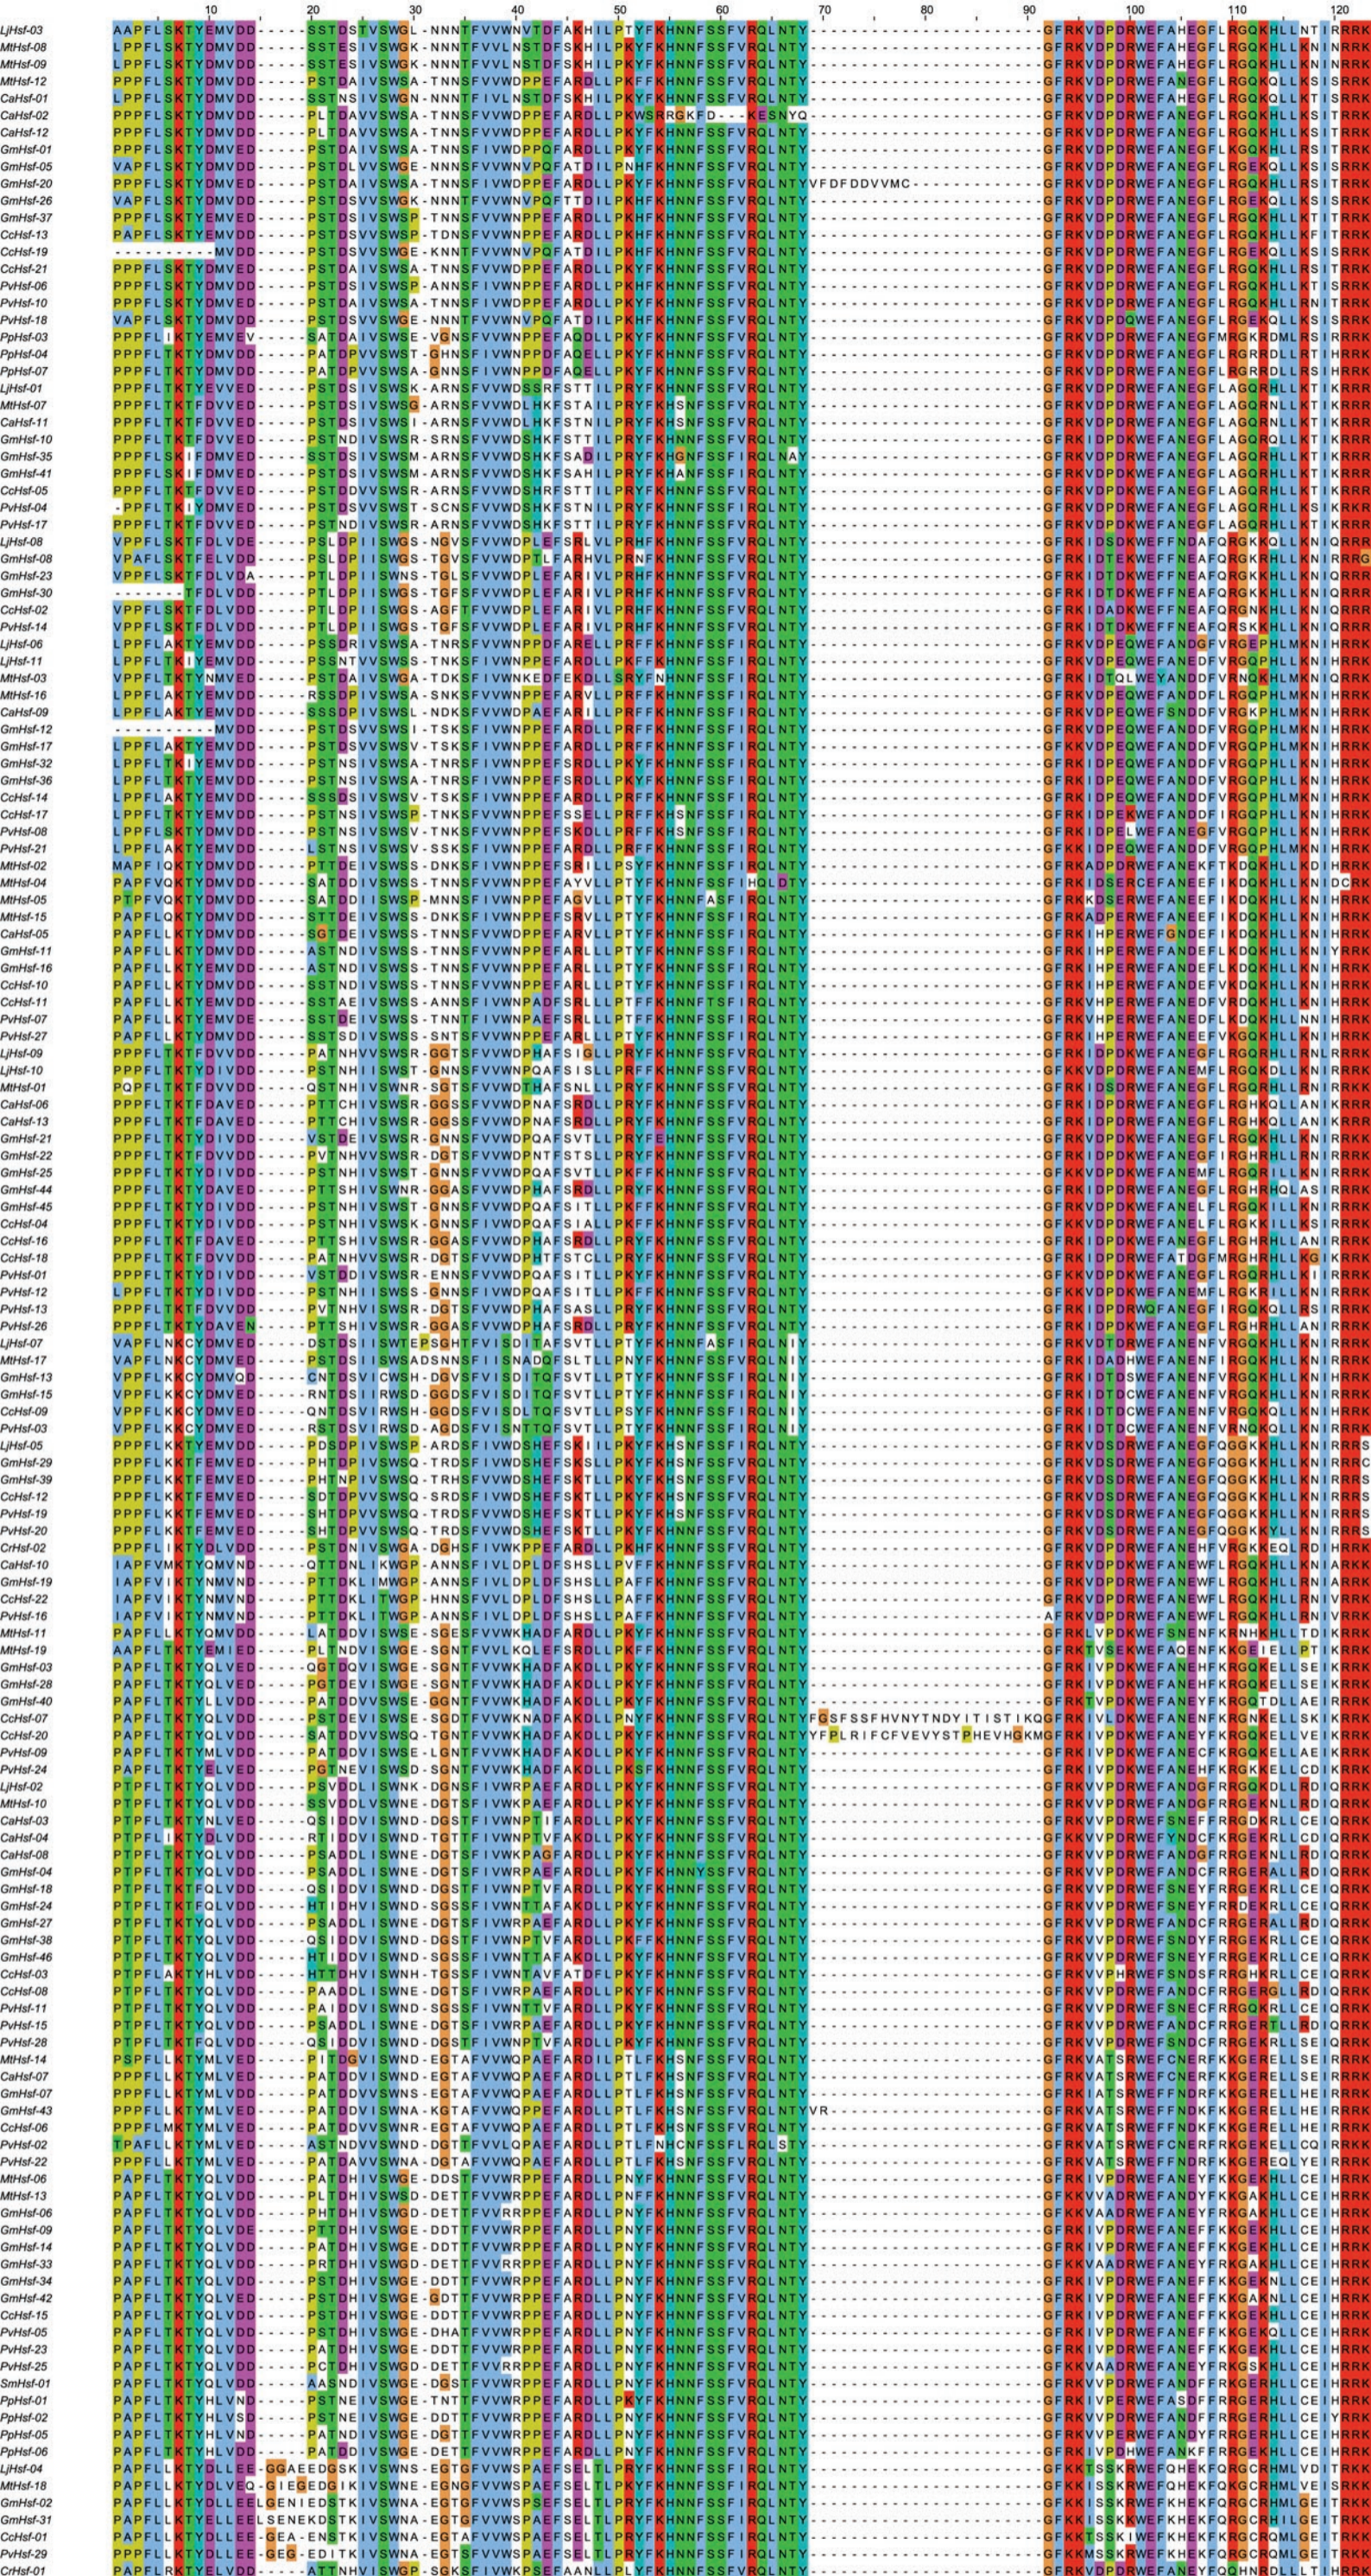

**Figure S1.** DBD domain alignment of Hsf proteins from *L. japonicus*, *M. truncatula*, *C. arietinum*, *G. max*, *C. cajan*, *P. vulgaris* and three lower plants. The multiple alignment results clearly show the highly conserved DBD domains among Hsfs. The secondary structure of DBD domain is formed of a three-helical bundle and a four stranded antiparallel  $\beta$ -sheet.
