# Supplementary material for: Genome Duplication and Gene Loss Affect the Evolution of Heat Shock Transcription Factor Genes in Legumes
Source: PubMed Central journal article supplement (PMC4105503; doi:10.1371/journal.pone.0102825), 2014-07-21
Supplement: pone.0102825.s002.pdf [file pone.0102825.s002.pdf]

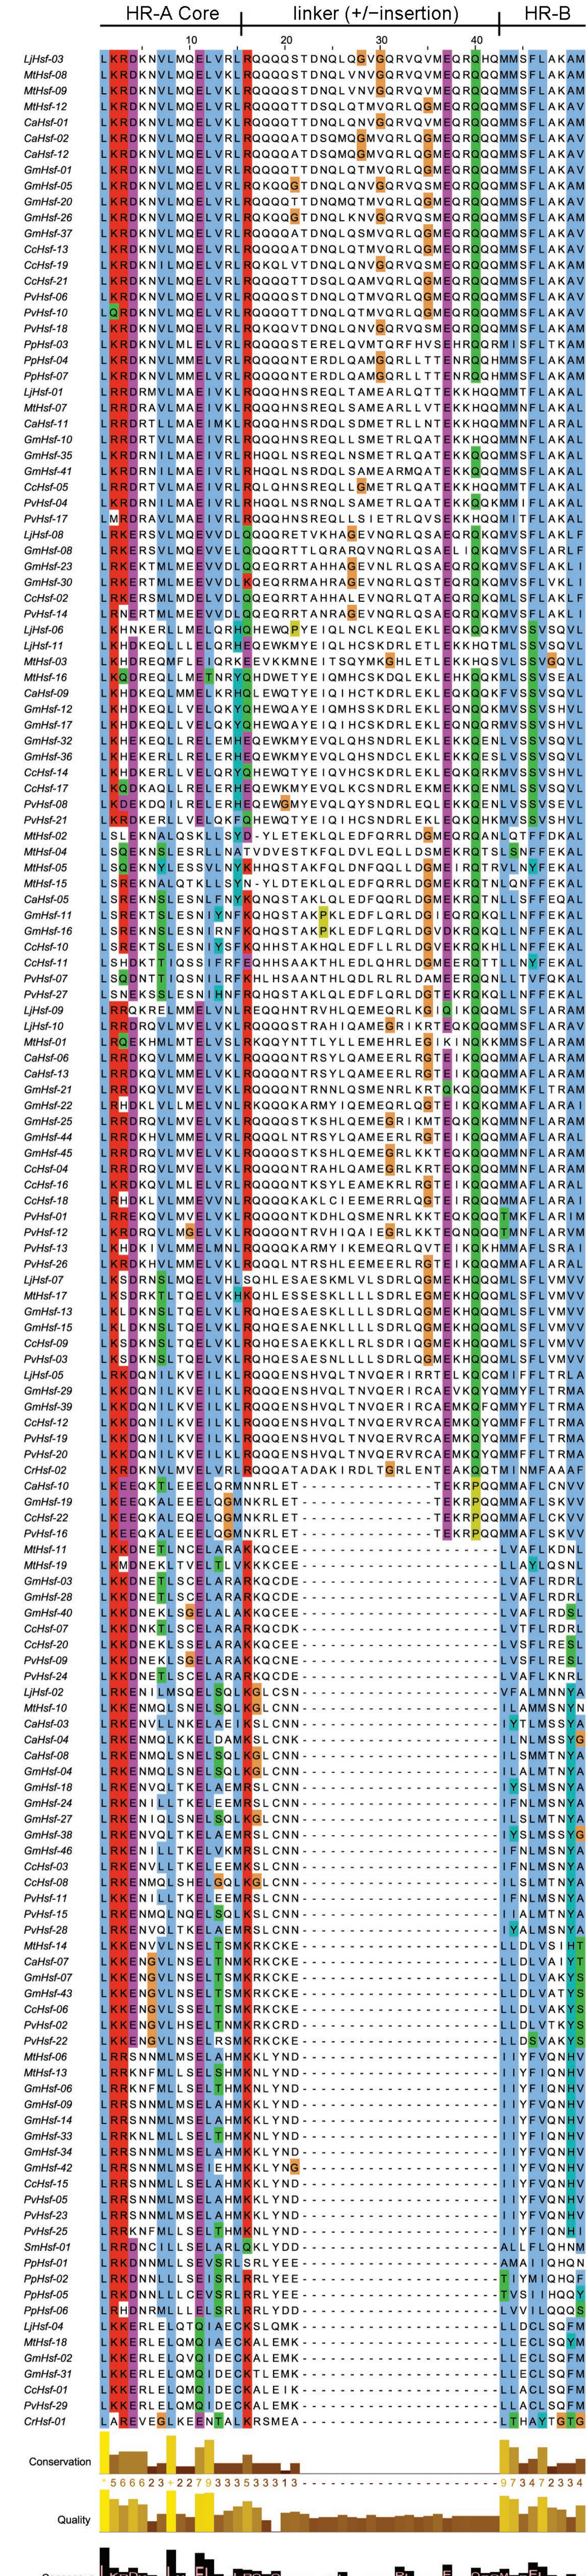

**Figure S2.** HR-A/B region alignment of Hsf proteins from *L. japonicus*, *M. truncatula*, *C. arrietinum*, *G. max*, *C. cajan*, *P. vulgaris* and three lower plants. The scheme at the top depicts the locations and boundaries of the HR-A core, insert, and HR-B regions within the HR-A/B regions. The HR-A/B region of class B Hsfs is compact, whereas class A and class C Hsfs have extended HR-A/B regions caused by insertions of 21 (class A) or 7 (class C) amino acid residues between the A and B parts.
