# Supplementary material for: Genome Duplication and Gene Loss Affect the Evolution of Heat Shock Transcription Factor Genes in Legumes
Source: PubMed Central journal article supplement (PMC4105503; doi:10.1371/journal.pone.0102825), 2014-07-21
Supplement: pone.0102825.s007.pdf [file pone.0102825.s007.pdf]

Table S1. Primers used in quantitative real-time PCR

| Gene name                         | Forword primers (5'-3') | Reverse primers (5'-3') |
|-----------------------------------|-------------------------|-------------------------|
| <i>LjHsf-01</i>                   | GTGGGTCCTCCTCCATTTCTC   | GAGTCCCAGACGACGAAGCT    |
| <i>LjHsf-02</i>                   | CTCCTCGCAGGAACCTGATG    | TCCAACCAAGGCTCCTGATC    |
| <i>LjHsf-03</i>                   | CCTGCTGTGTTGACGGATTG    | TCTGTCCCCGATCCTTGAAC    |
| <i>LjHsf-04</i>                   | AAGAAGTGCAGCAAGTGTGT    | GCGTCTGCAGCTCCAATCTC    |
| <i>LjHsf-05</i>                   | CTCTCCGACGACGGTTTCAG    | TCGTGCAACCCTTCCATTG     |
| <i>LjHsf-06</i>                   | GCCGGTTCACAGCCATTCTA    | TGCCACTCGTGCTGATGTCT    |
| <i>LjHsf-07</i>                   | CGACATGGTGGAGGACGATT    | AAAGCGGTGATGTCGGAGAT    |
| <i>LjHsf-08</i>                   | AGCGAGGGAAGAAGCAGTTG    | TCCCGGCATCAGAAGAAGA     |
| <i>LjHsf-09</i>                   | CCCAGCCAATGGAAGGACTT    | CATGGTTGGTAGCTGGATCGT   |
| <i>LjHsf-10</i>                   | TCCTATTCTGGTGGCGTTCCT   | CTGTTATTCCTGTGCTCCATGA  |
| <i>LjHsf-11</i>                   | AGTCACCCAGCATCGACATG    | GGGCTGCTACTGCAGGTTGT    |
| <i><math>\beta</math>-tubulin</i> | CCCATTCCCTCGTCTCCATT    | GATCAGCGGCACACATCATG    |
