# Supplementary material for: Genome Duplication and Gene Loss Affect the Evolution of Heat Shock Transcription Factor Genes in Legumes
Source: PubMed Central journal article supplement (PMC4105503; doi:10.1371/journal.pone.0102825), 2014-07-21
Supplement: pone.0102825.s008.pdf [file pone.0102825.s008.pdf]

Table S2. Information about Hsfs in *L. japonicus*, *M. truncatula*, *C. arietinum*, *G. max*, *C. cajan*, *P. vulgaris*, *S. moellendorffii*, *P. patens* and *C. reinhardtii*.

| Species              | Gene name       | Gene identifier       | ORF (aa) | MW (Da)  | pI                         | Genomic position                 |
|----------------------|-----------------|-----------------------|----------|----------|----------------------------|----------------------------------|
| <i>L. japonicus</i>  | <i>LjHsf-01</i> | chr1.CM0133.500.r2.m  | 387      | 43259.36 | 5.01                       | LjChr1:23590373..23591777        |
|                      | <i>LjHsf-02</i> | chr2.CM0021.3250.r2.m | 336      | 36577.72 | 5.1                        | LjChr2:31394445..31395549        |
|                      | <i>LjHsf-03</i> | chr3.CM0127.360.r2.m  | 487      | 54185.41 | 5.04                       | LjChr3:46840532..46842190        |
|                      | <i>LjHsf-04</i> | chr4.CM0432.1390.r2.a | 208      | 24212.45 | 7.62                       | LjChr4:6965150..6966843          |
|                      | <i>LjHsf-05</i> | chr4.CM0297.80.r2.a   | 392      | 44390.32 | 5.82                       | LjChr4:31165488..31167003        |
|                      | <i>LjHsf-06</i> | chr4.CM0046.1600.r2.m | 401      | 45706.92 | 5.34                       | LjChr4:36402041..36403354        |
|                      | <i>LjHsf-07</i> | chr4.CM0042.1450.r2.m | 367      | 41932.29 | 5.14                       | LjChr4:42520512..42522368        |
|                      | <i>LjHsf-08</i> | chr5.CM0359.80.r2.m   | 512      | 57909.21 | 5.32                       | LjChr5:11584169..11586589        |
|                      | <i>LjHsf-09</i> | chr5.CM0024.490.r2.m  | 331      | 38078.98 | 5.81                       | LjChr5:17733842..17735506        |
|                      | <i>LjHsf-10</i> | chr5.CM0200.740.r2.m  | 354      | 41006.94 | 5.42                       | LjChr5:32187112..32188847        |
|                      | <i>LjHsf-11</i> | chr6.CM0118.900.r2.d  | 395      | 44937.97 | 5.31                       | LjChr6:24525770..24527094        |
| <i>M. truncatula</i> | <i>MtHsf-01</i> | Medtr1g071360.1       | 372      | 43603.44 | 5.68                       | MtChr1:17592134..17594193        |
|                      | <i>MtHsf-02</i> | Medtr1g107080.1       | 329      | 37656.99 | 4.95                       | MtChr1:31581884..31583623        |
|                      | <i>MtHsf-03</i> | Medtr2g017890.1       | 474      | 53638.98 | 5.24                       | MtChr2:5427722..5430795          |
|                      | <i>MtHsf-04</i> | Medtr2g100670.1       | 419      | 47285.64 | 4.66                       | MtChr2:32133687..32137145        |
|                      | <i>MtHsf-05</i> | Medtr2g100680.1       | 444      | 49984.17 | 6.55                       | MtChr2:32138306..32140457        |
|                      | <i>MtHsf-06</i> | Medtr3g101870.1       | 373      | 42189.14 | 7.73                       | MtChr3:35982638..35985479        |
|                      | <i>MtHsf-07</i> | Medtr3g104550.1       | 378      | 42625.82 | 4.94                       | MtChr3:36702717..36704919        |
|                      | <i>MtHsf-08</i> | Medtr4g077970.1       | 493      | 54955.32 | 5.15                       | MtChr4:25511197..25514751        |
|                      | <i>MtHsf-09</i> | Medtr4g078070.1       | 493      | 54955.32 | 5.15                       | MtChr4:25567635..25571189        |
|                      | <i>MtHsf-10</i> | Medtr5g010680.1       | 359      | 39641.46 | 5.16                       | MtChr5:2665834..2669177          |
|                      | <i>MtHsf-11</i> | Medtr5g017470.1       | 432      | 49356.85 | 8.86                       | MtChr5:6122009..6130936          |
|                      | <i>MtHsf-12</i> | Medtr5g029680.1       | 502      | 55357.62 | 4.72                       | MtChr5:12227106..12231942        |
|                      | <i>MtHsf-13</i> | Medtr5g089170.1       | 254      | 29617.47 | 6.45                       | MtChr5:37712245..37713757        |
|                      | <i>MtHsf-14</i> | Medtr7g091370.1       | 233      | 26980.61 | 8.9                        | MtChr7:28797928..28800318        |
|                      | <i>MtHsf-15</i> | Medtr8g083100.1       | 487      | 54344.07 | 5.05                       | MtChr8:22854701..22858145        |
|                      | <i>MtHsf-16</i> | Medtr8g087540.1       | 401      | 45835.01 | 5.23                       | MtChr8:24376345..24378486        |
|                      | <i>MtHsf-17</i> | Medtr8g105780.1       | 371      | 42183.31 | 5.07                       | MtChr8:31473372..31476090        |
|                      | <i>MtHsf-18</i> | AC233659_12.1         | 210      | 24509.92 | 6.15                       | AC233659:14179947..14181646      |
| <i>MtHsf-19</i>      | CU571152_1015.1 | 256                   | 28580.25 | 6.37     | CU571152.5:66438..76780    |                                  |
| <i>C. arietinum</i>  | <i>CaHsf-01</i> | TC01236               | 494      | 55088.64 | 5.06                       | n.d.                             |
|                      | <i>CaHsf-02</i> | TC02426               | 497      | 54812.79 | 4.79                       | n.d.                             |
|                      | <i>CaHsf-03</i> | TC04763               | 332      | 36929.52 | 6.85                       | n.d.                             |
|                      | <i>CaHsf-04</i> | TC04961               | 267      | 30044.06 | 8.39                       | n.d.                             |
|                      | <i>CaHsf-05</i> | TC05890               | 482      | 54488.23 | 5.24                       | n.d.                             |
|                      | <i>CaHsf-06</i> | TC07370               | 351      | 40615.67 | 5.19                       | n.d.                             |
|                      | <i>CaHsf-07</i> | TC09172               | 240      | 27627.17 | 8.52                       | n.d.                             |
|                      | <i>CaHsf-08</i> | TC10527               | 337      | 37124.35 | 5.43                       | n.d.                             |
|                      | <i>CaHsf-09</i> | TC11068               | 401      | 45693.15 | 5.28                       | n.d.                             |
|                      | <i>CaHsf-10</i> | TC12461               | 258      | 29873.94 | 5.32                       | n.d.                             |
|                      | <i>CaHsf-11</i> | TC15059               | 367      | 41782.48 | 4.83                       | n.d.                             |
|                      | <i>CaHsf-12</i> | TC34529               | 473      | 52722.63 | 4.87                       | n.d.                             |
|                      | <i>CaHsf-13</i> | TC34660               | 310      | 35746.43 | 6.64                       | n.d.                             |
| <i>G. max</i>        | <i>GmHsf-01</i> | Glyma01g01990.1       | 461      | 50843.64 | 5.31                       | GmChr1:1541377..1544307          |
|                      | <i>GmHsf-02</i> | Glyma01g34490.1       | 209      | 24228.42 | 7.01                       | GmChr1:46835978..46838383        |
|                      | <i>GmHsf-03</i> | Glyma01g39260.1       | 282      | 31193.84 | 9.01                       | GmChr1:51227519..51229606        |
|                      | <i>GmHsf-04</i> | Glyma01g42640.1       | 338      | 36922.86 | 5.14                       | GmChr1:53862802..53863906        |
|                      | <i>GmHsf-05</i> | Glyma01g44330.1       | 464      | 51846.82 | 4.93                       | GmChr1:55025297..55027987        |
|                      | <i>GmHsf-06</i> | Glyma02g44670.1       | 291      | 34062.94 | 6.59                       | GmChr2:49172352..49173651        |
|                      | <i>GmHsf-07</i> | Glyma03g29190.1       | 231      | 26714.21 | 8.8                        | GmChr3:37141517..37145012        |
|                      | <i>GmHsf-08</i> | Glyma03g34900.1       | 423      | 48268.08 | 5.58                       | GmChr3:42204941..42207241        |
|                      | <i>GmHsf-09</i> | Glyma04g04200.1       | 363      | 40646.71 | 8.41                       | GmChr4:3095592..3096844          |
|                      | <i>GmHsf-10</i> | Glyma04g05500.2       | 372      | 41922.78 | 5.08                       | GmChr4:4167574..4169572          |
|                      | <i>GmHsf-11</i> | Glyma05g28460.1       | 479      | 54028.91 | 5.43                       | GmChr5:34265160..34270029        |
|                      | <i>GmHsf-12</i> | Glyma05g29470.1       | 382      | 43805.67 | 5.01                       | GmChr5:35079785..35081242        |
|                      | <i>GmHsf-13</i> | Glyma05g34450.1       | 358      | 41018.33 | 5.23                       | GmChr5:38783656..38785937        |
|                      | <i>GmHsf-14</i> | Glyma06g04390.1       | 363      | 40469.37 | 8.44                       | GmChr6:3057619..3058862          |
|                      | <i>GmHsf-15</i> | Glyma08g05220.1       | 364      | 41717.06 | 5.14                       | GmChr8:3703299..3706068          |
|                      | <i>GmHsf-16</i> | Glyma08g11460.1       | 477      | 53896.74 | 5.66                       | GmChr8:8333717..8338512          |
|                      | <i>GmHsf-17</i> | Glyma08g12630.1       | 402      | 45953.05 | 5.07                       | GmChr8:9242535..9244700          |
|                      | <i>GmHsf-18</i> | Glyma09g26510.1       | 324      | 35584.71 | 5.73                       | GmChr9:32991190..32992574        |
|                      | <i>GmHsf-19</i> | Glyma09g32300.1       | 320      | 35975.78 | 6.28                       | GmChr9:38833147..38834811        |
|                      | <i>GmHsf-20</i> | Glyma09g33920.1       | 500      | 55532.95 | 4.91                       | GmChr9:40400230..40403665        |
|                      | <i>GmHsf-21</i> | Glyma10g00560.1       | 324      | 37698.14 | 4.63                       | GmChr10:320843..322652           |
|                      | <i>GmHsf-22</i> | Glyma10g03530.1       | 341      | 39741.93 | 5.69                       | GmChr10:2568451..2569878         |
|                      | <i>GmHsf-23</i> | Glyma10g07620.1       | 435      | 48910.19 | 5.72                       | GmChr10:6371342..6374987         |
|                      | <i>GmHsf-24</i> | Glyma10g38240.1       | 289      | 32546.75 | 7.05                       | GmChr10:46052164..46053421       |
|                      | <i>GmHsf-25</i> | Glyma10g38930.1       | 448      | 52058.88 | 5.96                       | GmChr10:46662541..46665008       |
|                      | <i>GmHsf-26</i> | Glyma11g01190.1       | 464      | 52020.26 | 5.33                       | GmChr11:684016..687478           |
|                      | <i>GmHsf-27</i> | Glyma11g02800.1       | 355      | 38652.8  | 4.96                       | GmChr11:1807814..1810003         |
|                      | <i>GmHsf-28</i> | Glyma11g06010.1       | 285      | 31585.34 | 9.11                       | GmChr11:4245812..4247876         |
|                      | <i>GmHsf-29</i> | Glyma13g16510.1       | 368      | 42400.06 | 6.98                       | GmChr13:20463262..20465356       |
|                      | <i>GmHsf-30</i> | Glyma13g21490.1       | 428      | 48234.94 | 5.15                       | GmChr13:25054276..25057239       |
|                      | <i>GmHsf-31</i> | Glyma13g24860.1       | 213      | 24798.1  | 7.64                       | GmChr13:28171233..28173625       |
|                      | <i>GmHsf-32</i> | Glyma13g29760.1       | 392      | 44933.77 | 4.89                       | GmChr13:32612241..32614169       |
|                      | <i>GmHsf-33</i> | Glyma14g04070.1       | 250      | 29124.02 | 8.87                       | GmChr14:2700334..2701445         |
|                      | <i>GmHsf-34</i> | Glyma14g09190.1       | 370      | 42035.88 | 7.72                       | GmChr14:7208889..7210925         |
|                      | <i>GmHsf-35</i> | Glyma14g11030.1       | 362      | 41051.65 | 4.78                       | GmChr14:9314476..9317368         |
|                      | <i>GmHsf-36</i> | Glyma15g09280.1       | 392      | 44878.89 | 5.08                       | GmChr15:6616217..6618219         |
| <i>GmHsf-37</i>      | Glyma16g13400.1 | 510                   | 56348.77 | 4.92     | GmChr16:14375544..14380501 |                                  |
| <i>GmHsf-38</i>      | Glyma16g32070.1 | 348                   | 37759    | 6.12     | GmChr16:35256650..35258245 |                                  |
| <i>GmHsf-39</i>      | Glyma17g06160.1 | 360                   | 41608.04 | 8.53     | GmChr17:4358386..4360467   |                                  |
| <i>GmHsf-40</i>      | Glyma17g20070.1 | 282                   | 30982.62 | 6.03     | GmChr17:18609225..18613267 |                                  |
| <i>GmHsf-41</i>      | Glyma17g34540.1 | 336                   | 38138.23 | 5.17     | GmChr17:38530630..38533545 |                                  |
| <i>GmHsf-42</i>      | Glyma17g35980.1 | 364                   | 41570.35 | 8.47     | GmChr17:39960997..39962650 |                                  |
| <i>GmHsf-43</i>      | Glyma19g31940.1 | 233                   | 26787.39 | 9.39     | GmChr19:39720668..39723322 |                                  |
| <i>GmHsf-44</i>      | Glyma19g34210.1 | 370                   | 42387.41 | 5.44     | GmChr19:41827148..41829192 |                                  |
| <i>GmHsf-45</i>      | Glyma20g28870.1 | 341                   | 39451.63 | 5.16     | GmChr20:37820334..37821899 |                                  |
| <i>GmHsf-46</i>      | Glyma20g29610.1 | 300                   | 33295.55 | 8.73     | GmChr20:38484532..38485826 |                                  |
| <i>C. cajan</i>      | <i>CcHsf-01</i> | C.cajan_19915         | 205      | 23661    | 7.58                       | CcChr1:7615927..7617782          |
|                      | <i>CcHsf-02</i> | C.cajan_06276         | 410      | 46558.38 | 5.51                       | CcChr2:18828876..18832166        |
|                      | <i>CcHsf-03</i> | C.cajan_07385         | 251      | 28297.08 | 9.24                       | CcChr2:30447647..30448481        |
|                      | <i>CcHsf-04</i> | C.cajan_07476         | 328      | 38364.1  | 5.43                       | CcChr2:31450060..31451723        |
|                      | <i>CcHsf-05</i> | C.cajan_09277         | 337      | 38286.89 | 5.39                       | CcChr3:12799267..12800550        |
|                      | <i>CcHsf-06</i> | C.cajan_09456         | 231      | 26740.16 | 9.08                       | CcChr3:14507414..14510213        |
|                      | <i>CcHsf-07</i> | C.cajan_12769         | 289      | 32419.51 | 9.29                       | CcChr6:18256391..18257755        |
|                      | <i>CcHsf-08</i> | C.cajan_13182         | 352      | 38389.47 | 5.21                       | CcChr6:22270411..22271556        |
|                      | <i>CcHsf-09</i> | C.cajan_15551         | 362      | 41652.91 | 5                          | CcChr8:2169380..2171458          |
|                      | <i>CcHsf-10</i> | C.cajan_01041         | 404      | 45615.51 | 5.86                       | CcChr11:11017250..11021000       |
|                      | <i>CcHsf-11</i> | C.cajan_03188         | 443      | 49847.83 | 5.02                       | CcChr11:35100306..35101777       |
|                      | <i>CcHsf-12</i> | C.cajan_03745         | 360      | 41267.43 | 5.4                        | CcChr11:41298162..41299801       |
|                      | <i>CcHsf-13</i> | C.cajan_25281         | 514      | 56492.73 | 4.81                       | CcScaffold000155:676508..683343  |
|                      | <i>CcHsf-14</i> | C.cajan_32266         | 353      | 40801.49 | 5.41                       | CcScaffold000182:110140..111471  |
|                      | <i>CcHsf-15</i> | C.cajan_33410         | 304      | 34943.21 | 8.71                       | CcScaffold000208:172995..174383  |
|                      | <i>CcHsf-16</i> | C.cajan_30804         | 342      | 39883.92 | 5.8                        | CcScaffold000221:157822..159747  |
|                      | <i>CcHsf-17</i> | C.cajan_29530         | 347      | 40099.85 | 5.42                       | CcScaffold128446:59890..61178    |
|                      | <i>CcHsf-18</i> | C.cajan_30373         | 342      | 39615.96 | 5.72                       | CcScaffold128680:155900..157182  |
|                      | <i>CcHsf-19</i> | C.cajan_24088         | 449      | 50349.2  | 5.19                       | CcScaffold130941:699987..702801  |
|                      | <i>CcHsf-20</i> | C.cajan_37173         | 297      | 32824.83 | 6.96                       | CcScaffold132487:91136..94149    |
|                      | <i>CcHsf-21</i> | C.cajan_36375         | 493      | 54295.56 | 4.79                       | CcScaffold132641:25714..29499    |
|                      | <i>CcHsf-22</i> | C.cajan_27606         | 303      | 34299.81 | 5.82                       | CcScaffold132776:531150..532716  |
| <i>P. vulgaris</i>   | <i>PvHsf-01</i> | Phvulv091021617m      | 334      | 38667.39 | 4.82                       | PvScaffold00001:251683..253586   |
|                      | <i>PvHsf-02</i> | Phvulv091021516m      | 241      | 28258.45 | 9.2                        | PvScaffold00001:2697465..2700690 |
|                      | <i>PvHsf-03</i> | Phvulv091020489m      | 360      | 41209.45 | 4.9                        | PvScaffold00002:4048025..4051185 |
|                      | <i>PvHsf-04</i> | Phvulv091010948m      | 373      | 42462.58 | 4.91                       | PvScaffold00004:136234..138819   |
|                      | <i>PvHsf-05</i> | Phvulv091010839m      | 339      | 38843.55 | 7.31                       | PvScaffold00004:1726980..1728693 |
|                      | <i>PvHsf-06</i> | Phvulv091011519m      | 474      | 52777.74 | 4.9                        | PvScaffold00005:2620246..2624309 |
|                      | <i>PvHsf-07</i> | Phvulv091015583m      | 441      | 49829.8  | 5.61                       | PvScaffold00008:147554..149599   |
|                      | <i>PvHsf-08</i> | Phvulv091022066m      | 386      | 43876.73 | 5.01                       | PvScaffold00013:1987221..1989485 |
|                      | <i>PvHsf-09</i> | Phvulv091016481m      | 278      | 30720.38 | 5.92                       | PvScaffold00017:1210184..1213352 |
|                      | <i>PvHsf-10</i> | Phvulv091016314m      | 490      | 54230.43 | 5.02                       | PvScaffold00022:22643..26535     |
|                      | <i>PvHsf-11</i> | Phvulv091023300m      | 304      | 34047.3  | 7.02                       | PvScaffold00029:513050..514633   |
|                      | <i>PvHsf-12</i> | Phvulv091023279m      | 353      | 40995.34 | 5.29                       | PvScaffold00029:1336185..1338209 |
