# Supplementary material for: Genome Duplication and Gene Loss Affect the Evolution of Heat Shock Transcription Factor Genes in Legumes
Source: PubMed Central journal article supplement (PMC4105503; doi:10.1371/journal.pone.0102825), 2014-07-21
Supplement: pone.0102825.s009.pdf [file pone.0102825.s009.pdf]

Table S3. Domain and motif survey of legume and three lower plants Hsfs.

| Gene name       | Group | DBD     | OD      | NLS               | NES                | AHA1              | AHA2              |
|-----------------|-------|---------|---------|-------------------|--------------------|-------------------|-------------------|
| <i>LjHsf-03</i> | A1    | 2-95    | 132-182 | (206) KKRR        |                    | (424) DEFWEQFF    |                   |
| <i>MtHsf-08</i> | A1    | 10-103  | 140-190 | (214) KKRR        | (484) LLASDSTL     | (424) DEFWEQFFRP  |                   |
| <i>MtHsf-09</i> | A1    | 10-103  | 140-190 | (214) KKRR        | (484) LLASDSTL     | (424) DEFWEQFFRP  |                   |
| <i>MtHsf-12</i> | A1    | 30-123  | 161-211 | (236) KKRR        | (424) LPIDLDCL     | (443) SSIWDDLL    |                   |
| <i>CaHsf-01</i> | A1    | 10-103  | 140-190 | (214) KKRR        | (479) LTQQMELL     | (425) DEFWELFFM   |                   |
| <i>CaHsf-02</i> | A1    | 30-120  | 158-208 | (233) KKRR        | (480) LDQLTEQM     | (439) PSIWDDLQQT  |                   |
| <i>CaHsf-12</i> | A1    | 3-96    | 134-184 | (209) KKRR        | (465) LLSSDR       | (415) PSIWDDLQQT  |                   |
| <i>GmHsf-01</i> | A1    | 18-111  | 149-199 | (224) KKRR        | (453) LLSSD        | (403) NPIWDEIL    |                   |
| <i>GmHsf-05</i> | A1    | 12-105  | 141-191 | (216) KKRR        | (453) LTQQMGL      | (399) DEFWELFLRP  |                   |
| <i>GmHsf-20</i> | A1    | 18-121  | 159-209 | (234) KKRR        | (492) LLSSN        | (442) NPIWDEIL    |                   |
| <i>GmHsf-26</i> | A1    | 12-105  | 141-191 | (216) KKRR        | (453) LTQQMGL      | (399) DEFWELFLRP  |                   |
| <i>GmHsf-37</i> | A1    | 28-121  | 158-208 | (233) KKRR        | (502) LLSSD        | (452) PHFWDDLRT   |                   |
| <i>CcHsf-13</i> | A1    | 31-124  | 162-212 | (236) KKRR        | (506) LLSSDT       | (456) PHFWDDIVRT  |                   |
| <i>CcHsf-19</i> | A1    | 1-84    | 120-170 | (195) KKRR        | (438) LTQQMGLL     | (384) DEFWELFFRP  |                   |
| <i>CcHsf-21</i> | A1    | 18-111  | 148-198 | (224) KKRR        | (485) LLSSD        | (435) PSIWDDLQQT  |                   |
| <i>PvHsf-06</i> | A1    | 25-118  | 156-206 | (231) KKRR        | (466) LLSSD        | (416) PNFWDDIV    |                   |
| <i>PvHsf-10</i> | A1    | 18-111  | 149-199 | (224) KKRR        | (482) LLSSDT       | (432) PSIWDEILQT  |                   |
| <i>PvHsf-18</i> | A1    | 12-105  | 141-191 | (216) KKRR        | (454) LTKQMGLL     | (400) DEFWELFFRP  |                   |
| <i>PpHsf-03</i> | A1    | 43-136  | 163-213 | (234) RKKRR       |                    | (405) SGFWEQFLTE  |                   |
| <i>PpHsf-04</i> | A1    | 56-149  | 190-240 | (263) RKKRR       | (467) LDGDLDL      | (449) DIFWEQFL    |                   |
| <i>PpHsf-07</i> | A1    | 56-149  | 192-242 | (265) RKKRR       | (472) LDHDLDL      | (454) DIFWEQFLSE  |                   |
| <i>LjHsf-01</i> | A2    | 46-139  | 169-219 | (244) RKKRR       | (376) LVDHMGYL     | (291) GSIFSAAYDN  | (367) DDWTEDLQD   |
| <i>MtHsf-07</i> | A2    | 44-137  | 168-218 | (239) KRKRR       | (244) LTASLSLENL   | (321) DAVWEDLL    | (361) DNWTVDLQK   |
| <i>CaHsf-11</i> | A2    | 45-138  | 170-220 | (241) KRKRR       | (359) LVDQMDF      | (309) DTVWEDLLNQ  | (349) DDDWTVDLQK  |
| <i>GmHsf-10</i> | A2    | 41-134  | 166-216 | (239) RKKRR       | (361) LVDHMGYL     | (312) DSVWEDLLNQ  | (351) ADEWSEDLQK  |
| <i>GmHsf-35</i> | A2    | 41-134  | 164-214 | (239) NRKRR       | (354) LVDHMDYL     | (280) DTFWSPAYDN  | (345) DDWSEQLQD   |
| <i>GmHsf-41</i> | A2    | 40-133  | 163-213 | (239) NRKRR       |                    | (268) DTFWSPAYDN  |                   |
| <i>CcHsf-05</i> | A2    | 40-133  | 163-213 | (236) RKKRR       | (326) LVDHMGYL     | (269) ESFFSAACDD  | (316) DDEWNEDELQK |
| <i>PvHsf-04</i> | A2    | 43-135  | 164-214 | (240) NRKRR       | (345) LEDLVAN      | (280) DTFWSPAFDS  | (353) DDWMEQFQD   |
| <i>PvHsf-17</i> | A2    | 43-136  | 166-216 | (239) RKKRR       | (362) LVDHLGHL     | (313) DAIWEDLLNQ  | (353) DEWSEDLQK   |
| <i>LjHsf-08</i> | A3    | 92-185  | 214-264 | (276) KKK8RVRRK   |                    | (311) PDWGNMIM    |                   |
| <i>GmHsf-08</i> | A3    | 37-130  | 159-209 | (230) PKVRRRF     |                    | (259) QPDWRNV     | (412) DMWDINYL    |
| <i>GmHsf-23</i> | A3    | 45-138  | 169-219 | (229) RHKK8RVVRK  |                    | (351) EDIWDSDGLNV | (393) SDIWDIGLG   |
| <i>GmHsf-30</i> | A3    | 1-87    | 118-168 | (189) RVVRK       | (393) LGSGLGD      | (218) HDWRNIGM    | (344) EDIWDSDGLNV |
| <i>CcHsf-02</i> | A3    | 17-110  | 141-191 | (201) RHKK        | (312) LDFSALGI     | (242) PDWRIIGMS   | (326) EDIWDSDGLNV |
| <i>PvHsf-14</i> | A3    | 20-113  | 144-194 | (204) RHKK        |                    | (245) PDWRNIDMSS  | (368) EDIWDSDGLNV |
| <i>LjHsf-06</i> | A4    | 11-104  | 135-185 | (203) RKRR        | (240) LTLNMRERLDQ  | (254) MLFWETIAHE  | (337) DVFWEQFLTE  |
| <i>LjHsf-11</i> | A4    | 11-104  | 136-186 | (204) RKRR        | (248) LDSLES       | (255) MTFWENIVHD  | (340) DVFWEQFLTE  |
| <i>MtHsf-03</i> | A4    | 12-105  | 139-189 | (194) KKEQKRRK    | (234) LSLNLEQLDLL  | (248) MTFWEEITND  | (353) NEFWGQYL    |
| <i>MtHsf-16</i> | A4    | 10-103  | 134-184 | (202) RKRR        | (240) LTLNTERL     | (254) VAFWETLA    | (337) DVFWEQFLTE  |
| <i>CaHsf-09</i> | A4    | 11-104  | 135-185 | (204) RKRR        | (243) LNAERLDQL    | (255) MVFWETIAHE  | (337) DVFWEQFLTE  |
| <i>GmHsf-12</i> | A4    | 1-84    | 115-165 | (183) RKRR        | (220) LTLNVERLDQL  | (234) MAFWEAIVHD  | (318) DVFWEQFLTE  |
| <i>GmHsf-17</i> | A4    | 11-104  | 135-185 | (203) RKRR        | (240) LTLNVERLDQL  | (254) MAFWEAIVHD  | (338) DVFWEQFLTE  |
| <i>GmHsf-32</i> | A4    | 12-105  | 138-188 | (206) RKRR        | (195) LNLLLL       | (257) MTFWENITHD  | (341) DIFWERFLTE  |
| <i>GmHsf-36</i> | A4    | 12-105  | 138-188 | (206) RKRR        | (195) LNLLLL       | (257) MTFWEDITHD  | (341) DIFWERFLTE  |
| <i>CcHsf-14</i> | A4    | 11-104  | 135-185 | (203) RKRR        | (240) LTLNMRERLDQL | (254) MAFWEAIAHD  | (289) DVFWEQFLTE  |
| <i>CcHsf-17</i> | A4    | 11-104  | 137-187 | (206) RKRR        | (252) LLESSI       | (257) IEFWEEMSHD  | (299) DIFWEKFLTE  |
| <i>PvHsf-08</i> | A4    | 12-105  | 138-188 | (206) RKRR        |                    | (257) IMFWENIAHD  | (336) DIFWERFLTE  |
| <i>PvHsf-21</i> | A4    | 12-105  | 136-186 | (204) RKRR        | (241) LALNVERLDQL  | (255) VAFWEAIAHD  | (339) DVFWEQFLTE  |
| <i>MtHsf-02</i> | A5    | 20-113  | 140-189 | (200) RK10KKRRL   | (257) LSLADLDM     | (307) DVFWEQFLTE  |                   |
| <i>MtHsf-04</i> | A5    | 139-232 | 259-309 | (317) HVRR        | (356) LRLELS       |                   |                   |
| <i>MtHsf-05</i> | A5    | 54-147  | 174-224 | (234) KRK10KKRR   | (349) ISRQLNLTL    | (435) DLFWEQFLTE  |                   |
| <i>MtHsf-15</i> | A5    | 20-113  | 140-189 | (200) RK10KKRRL   | (253) LRLELS       | (435) DVFWENFLTE  |                   |
| <i>CaHsf-05</i> | A5    | 15-108  | 135-185 | (208) KKRR        | (477) MDNLTL       | (431) DVFWEQFLTE  |                   |
| <i>GmHsf-11</i> | A5    | 13-106  | 133-183 | (194) RK9KKRRLP   | (474) MDQLTL       | (427) DVFWEQFLTE  |                   |
| <i>GmHsf-16</i> | A5    | 11-104  | 131-181 | (192) RK9KKRRLP   | (472) MDQLTL       | (425) DVFWEQFLTE  |                   |
| <i>CcHsf-10</i> | A5    | 13-106  | 133-183 | (194) RK10KKRRL   | (399) MDQLTL       | (352) DVFWEQFLTE  |                   |
| <i>CcHsf-11</i> | A5    | 14-107  | 131-181 | (192) RR10KKRRL   | (438) MDQLTL       | (391) DVFWEQFLTE  |                   |
| <i>PvHsf-07</i> | A5    | 12-105  | 131-181 | (204) KKRR        |                    | (389) DVFWEQFLTE  |                   |
| <i>PvHsf-27</i> | A5    | 18-111  | 138-188 | (211) KKRR        | (482) MDQLRL       | (435) DVFWEQFLTE  |                   |
| <i>LjHsf-10</i> | A6    | 38-131  | 160-210 | (223) KEWRK7KKRRR | (338) LAEQLGYL     | (313) EVFWQDLLDE  |                   |
| <i>GmHsf-21</i> | A6    | 22-115  | 145-195 | (211) RK10KRIRS   | (312) LAEELGYL     | (283) EVLWEELNE   |                   |
| <i>GmHsf-25</i> | A6    | 124-217 | 251-301 | (326) NKRRR       | (380) LDLALNL      | (415) EVFWQDLLNE  |                   |
| <i>GmHsf-45</i> | A6    | 17-110  | 142-192 | (218) KKRRR       | (270) LPLVLNL      | (304) EVFWQDLLNE  |                   |
| <i>CcHsf-04</i> | A6    | 38-131  | 162-212 | (237) KKRRR       | (315) LAEQLGYL     | (293) EVFWQDLLNE  |                   |
| <i>PvHsf-01</i> | A6    | 34-127  | 153-203 | (229) KKRR        | (323) LSQELGYL     | (303) EGFWEEDLLAL |                   |
| <i>PvHsf-12</i> | A6    | 42-135  | 165-215 | (240) KKRR        | (287) LDLGLNL      | (319) EVFWQDLLKE  |                   |
| <i>LjHsf-09</i> | A7    | 32-125  | 150-200 | (213) KEKRR7RKRR  |                    | (304) EEFWEALLFS  |                   |
| <i>MtHsf-01</i> | A7    | 27-120  | 140-190 | (205) KKK9KKRRL   | (253) LEMLALEM     | (292) EGFWEEDLMFS |                   |
| <i>CaHsf-06</i> | A7    | 38-131  | 162-212 | (225) KEKRR7KKRRR |                    | (309) EGFGEELFSE  |                   |
| <i>CaHsf-13</i> | A7    | 38-131  | 162-212 | (225) KEKRR7KKRRR | (273) LEVLAMEM     |                   |                   |
| <i>GmHsf-22</i> | A7    | 39-132  | 158-208 | (232) KKRR        | (330) LANQLDLL     | (298) EEFWEELLFS  |                   |
| <i>GmHsf-44</i> | A7    | 46-139  | 173-223 | (236) KEKRR7KKRRR | (292) LEVLAM       | (328) EGFWEELFSE  |                   |
| <i>CcHsf-16</i> | A7    | 48-141  | 171-221 | (234) KEKRR7KKRRR | (265) LELLAMEM     | (301) EGFWEELFSE  |                   |
| <i>CcHsf-18</i> | A7    | 35-128  | 154-204 | (228) KKRR        | (331) LANQLGCF     | (299) EEFWEELCS   |                   |
| <i>PvHsf-13</i> | A7    | 41-134  | 160-210 | (234) KKRR        | (346) LANELGCL     | (314) EEFWEELLIS  |                   |
| <i>PvHsf-26</i> | A7    | 46-139  | 168-218 | (231) KEKRR7KKRRR | (286) LEVLAMEM     | (322) EGFWEELFSE  |                   |
| <i>LjHsf-07</i> | A8    | 14-108  | 144-194 | (246) KRKH        | (272) LKDLCSISSEFL | (307) DGSWEQLFLG  |                   |
| <i>MtHsf-17</i> | A8    | 20-114  | 151-201 | (253) KKKPVVPR    | (287) LKLLDEKLCPL  | (312) DGSWEQLFLG  |                   |
| <i>GmHsf-13</i> | A8    | 8-101   | 137-187 |                   | (281) LSPLN        | (298) DGSWEQLFLG  |                   |
| <i>GmHsf-15</i> | A8    | 14-107  | 143-193 |                   | (287) LSPLN        | (304) DGSWEQLFLG  |                   |
| <i>CcHsf-09</i> | A8    | 12-105  | 141-191 |                   | (285) LSPLN        | (302) DGLWEQLFLG  |                   |
| <i>PvHsf-03</i> | A8    | 12-105  | 141-191 |                   | (265) LKDLCL       | (300) DGSWEQLFLG  |                   |
| <i>LjHsf-05</i> | A9    | 60-153  | 179-229 | (243) KRKR8KRPRL  | (361) LELEDL       |                   |                   |
| <i>GmHsf-29</i> | A9    | 32-125  | 149-199 | (213) RKRKR8KRPRL | (287) LEDELCSLQGL  | (353) TDWVSGSASG  |                   |
| <i>GmHsf-39</i> | A9    | 27-120  | 144-194 | (208) RKRKR8KRPRL | (279) LEDELGNSLQGL | (345) TDWVSGSASG  |                   |
| <i>CcHsf-12</i> | A9    | 59-152  | 176-226 | (240) RKRKR8KRPRL | (334) IYLELEDL     | (346) TDWVSGSAGGL |                   |
| <i>PvHsf-19</i> | A9    | 70-163  | 187-237 | (251) RKRKR8KRPRL | (379) LELEDL       | (389) TDWVSGSTFG  |                   |
| <i>PvHsf-20</i> | A9    | 70-163  | 187-237 | (251) RKRKR8KRPRL | (379) LELEDL       | (389) TDWVSGSAGGL |                   |
| <i>CrHsf-02</i> | A     | 8-101   | 161-211 | (248) RKRKR       | (742) LSGLDL       |                   |                   |
| <i>MtHsf-11</i> | B1    | 114-207 | 271-300 | (355) KKR         | (406) LHPLEREITL   |                   |                   |
| <i>MtHsf-19</i> | B1    | 7-100   | 145-174 | (238) KRGR        | (152) LTVELTL      |                   |                   |
| <i>GmHsf-03</i> | B1    | 7-100   | 165-194 | (243) NHRKGR      |                    |                   |                   |
| <i>GmHsf-28</i> | B1    | 8-101   | 167-196 | (246) NHRKGR      |                    |                   |                   |
| <i>GmHsf-40</i> | B1    | 9-102   | 153-182 | (262) RKRGR       |                    |                   |                   |
| <i>CcHsf-07</i> | B1    | 7-123   | 183-212 | (262) KRGR        |                    |                   |                   |
| <i>CcHsf-20</i> | B1    | 7-123   | 176-205 | (278) RKR         |                    |                   |                   |
| <i>PvHsf-09</i> | B1    | 7-100   | 152-181 | (259) RKR         |                    |                   |                   |
| <i>PvHsf-24</i> | B1    | 7-100   | 166-195 | (247) KRVR        | (270) FEPLNL       |                   |                   |
| <i>LjHsf-02</i> | B2    | 20-113  | 187-216 | (280) KRHR        | (240) LELIPAKDL    |                   |                   |
| <i>MtHsf-10</i> | B2    | 22-115  | 190-219 | (300) KRKR        | (246) LDLLPLRNVSL  |                   |                   |
| <i>CaHsf-03</i> | B2    | 27-120  | 191-220 | (276) KRTR        |                    |                   |                   |
| <i>CaHsf-04</i> | B2    | 21-114  | 164-193 | (241) KRAR        |                    |                   |                   |
| <i>CaHsf-08</i> | B2    | 22-115  | 187-216 | (280) KRFR        |                    |                   |                   |
| <i>GmHsf-04</i> | B2    | 5-98    | 174-203 |                   |                    |                   |                   |
| <i>GmHsf-18</i> | B2    | 31-124  | 179-208 | (262) KRAR        |                    |                   |                   |
| <i>GmHsf-24</i> | B2    | 21-114  | 173-202 | (238) KRAR        |                    |                   |                   |
| <i>GmHsf-27</i> | B2    | 22-115  | 192-221 |                   |                    |                   |                   |
| <i>GmHsf-38</i> | B2    | 30-123  | 180-209 | (279) KRAR        |                    |                   |                   |
| <i>GmHsf-46</i> | B2    | 21-114  | 178-207 | (242) KKRAR       |                    |                   |                   |
| <i>CcHsf-03</i> | B2    | 19-112  | 143-172 | (212) KRGR        |                    |                   |                   |
| <i>CcHsf-08</i> | B2    | 22-115  | 190-219 | (286) KRKR        |                    |                   |                   |
| <i>PvHsf-11</i> | B2    | 21-114  | 177-206 | (249) KRKR        |                    |                   |                   |
| <i>PvHsf-15</i> | B2    | 22-115  | 190-219 | (292) KRKR        |                    |                   |                   |
| <i>PvHsf-28</i> | B2    | 28-121  | 182-211 | (275) KRAR        |                    |                   |                   |
| <i>MtHsf-14</i> | B3    | 20-113  | 153-182 | (154) KK12KRK     | (174) LLDLVI       |                   |                   |
| <i>CaHsf-07</i> | B3    | 20-113  | 157-186 | (172) KRKCK       | (178) LLDLVA       |                   |                   |
| <i>GmHsf-07</i> | B3    | 18-111  | 155-184 | (170) KRKCK       | (198) LFGVRL       |                   |                   |
| <i>GmHsf-43</i> | B3    | 18-113  | 157-186 | (172) KRKCK       | (200) LFGVRL       |                   |                   |
| <i>CcHsf-06</i> | B3    | 22-115  | 155-184 | (170) KRKCK       | (196) PKLFGVRL     |                   |                   |
| <i>PvHsf-02</i> | B3    | 57-150  | 187-216 | (202) KRKCR       | (228) LSFRLRL      |                   |                   |
| <i>PvHsf-22</i> | B3    | 19-112  | 156-185 | (171) KRKCK       | (199) LFGVRLDV     |                   |                   |
| <i>MtHsf-06</i> | B4    | 22-115  | 201-230 | (320) KTK8KKR     | (363) LGLNLM       |                   |                   |
| <i>MtHsf-13</i> | B4    | 23-116  | 166-195 | (245) KKRVRH      | (212) LKLEVEL      |                   |                   |
| <i>GmHsf-06</i> | B4    | 23-116  | 169-198 | (261) KKRLH       | (268) LEELHMMIISL  |                   |                   |
| <i>GmHsf-09</i> | B4    | 22-115  | 199-228 | (317) KTK8KKR     | (348) LEKDDLGLNL   |                   |                   |
| <i>GmHsf-14</i> | B4    | 22-115  | 200-229 | (317) KTK8KKR     | (348) LEKDDLGLNL   |                   |                   |
| <i>GmHsf-33</i> | B4    | 3-96    | 149-178 | (238) KKRLH       | (193) LKLELDS      |                   |                   |
| <i>GmHsf-34</i> | B4    | 22-115  | 201-230 | (318) KTK8KKR     | (354) LENEDELLGLNL |                   |                   |
| <i>GmHsf-42</i> | B4    | 12-105  | 194-223 | (310) KTK8KKR     | (348) LENEDELLGLNL |                   |                   |
| <i>CcHsf-15</i> | B4    | 22-115  | 149-178 | (249) RCKTK8KKR   | (292) LGLNLM       |                   |                   |
| <i>PvHsf-05</i> | B4    | 22-115  | 191-220 | (286) KTK8KKR     | (327) FGLNLM       |                   |                   |
| <i>PvHsf-23</i> | B4    | 22-115  | 181-210 | (302) KTK8KKR     | (338) LGLNLM       |                   |                   |
| <i>PvHsf-25</i> | B4    | 23-116  | 168-197 | (259) KKR         |                    |                   |                   |
| <i>SmHsf-01</i> | B4    | 22-101  | 192-221 | (270) RKR         | (292) IELELM       |                   |                   |
| <i>PpHsf-01</i> | B4    | 23-116  | 176-205 |                   |                    |                   |                   |
| <i>PpHsf-02</i> | B4    | 23-116  | 178-207 |                   |                    |                   |                   |
| <i>PpHsf-05</i> | B4    | 23-116  | 178-207 | (350) KRR         | (401) LLICA        |                   |                   |
| <i>PpHsf-06</i> | B4    | 26-119  | 181-210 |                   |                    |                   |                   |
