# Supplementary material for: Genome Duplication and Gene Loss Affect the Evolution of Heat Shock Transcription Factor Genes in Legumes
Source: PubMed Central journal article supplement (PMC4105503; doi:10.1371/journal.pone.0102825), 2014-07-21
Supplement: pone.0102825.s010.pdf [file pone.0102825.s010.pdf]

Table S4. Likelihood ratio tests and parameter estimations for the six site models based on the coding sequences of *G. max* Hsf genes.

| Site Model                                  | Assumption         | Estimates of Parameters                                                                           | -lnL        | LRT Statistic       | Df | chi-square(0.01) | Positively selected sites |
|---------------------------------------------|--------------------|---------------------------------------------------------------------------------------------------|-------------|---------------------|----|------------------|---------------------------|
| <b>Data set: <i>G. max</i> Hsf family</b>   |                    |                                                                                                   |             |                     |    |                  |                           |
| M0                                          | One-ratio          | $\omega=0.15765$                                                                                  | 11472.31973 |                     |    |                  | None                      |
| M1a                                         | Nearly neutral     | $p_0=0.64506, p_1=0.35494$<br>$\omega_0=0.11679, \omega_1=1$                                      | 11214.72377 |                     |    |                  | Not allowed               |
| M2a                                         | Selection          | $p_0=0.64506, p_1=0.16967, p_2=0.18527$<br>$\omega_0=0.11679, \omega_1=1, \omega_2=1$             | 11214.72377 | M1a VS M2a: 0       | 2  | 9.21             | None                      |
| M3                                          | Discrete           | $p_0=0.23362, p_1=0.40160, p_2=0.36478$<br>$\omega_0=0.00441, \omega_1=0.10859, \omega_2=0.39845$ | 10974.62579 | M0 VS M3: 995.38788 | 4  | 13.28            | None                      |
| M7                                          | $\beta$            | $p=0.53920, q=2.23895$                                                                            | 10966.95744 |                     |    |                  | Not allowed               |
| M8                                          | $\beta$ & $\omega$ | $p_0=0.99999, (p_1=0.00001), p=0.53920, q=2.23895$<br>$\omega=5.47020$                            | 10966.95887 | M7 VS M8: 0.00286   | 2  | 9.21             | None                      |
| <b>Data set: Class A <i>G. max</i> Hsfs</b> |                    |                                                                                                   |             |                     |    |                  |                           |
| M0                                          | One-ratio          | $\omega=0.20051$                                                                                  | 11029.63101 |                     |    |                  | None                      |
| M1a                                         | Nearly neutral     | $p_0=0.70765, p_1=0.29235$<br>$\omega_0=0.14421, \omega_1=1$                                      | 10783.30678 |                     |    |                  | Not allowed               |
| M2a                                         | Selection          | $p_0=0.70765, p_1=0.22183, p_2=0.07052$<br>$\omega_0=0.14421, \omega_1=1, \omega_2=1$             | 10783.30678 | M1a VS M2a: 0       | 2  | 9.21             | None                      |
| M3                                          | Discrete           | $p_0=0.29258, p_1=0.46116, p_2=0.24626$<br>$\omega_0=0.02343, \omega_1=0.19043, \omega_2=0.61686$ | 10642.48282 | M0 VS M3: 774.29638 | 4  | 13.28            | None                      |
| M7                                          | $\beta$            | $p=0.62699, q=1.88816$                                                                            | 10639.24953 |                     |    |                  | Not allowed               |
| M8                                          | $\beta$ & $\omega$ | $p_0=0.98516, (p_1=0.01484), p=0.64256, q=2.02031$<br>$\omega=1$                                  | 10639.19731 | M7 VS M8: 0.10444   | 2  | 9.21             | 127 Q                     |
| <b>Data set: Class B <i>G. max</i> Hsfs</b> |                    |                                                                                                   |             |                     |    |                  |                           |
| M0                                          | One-ratio          | $\omega=0.10951$                                                                                  | 4928.91152  |                     |    |                  | None                      |
| M1a                                         | Nearly neutral     | $p_0=0.79009, p_1=0.20991$<br>$\omega_0=0.07064, \omega_1=1$                                      | 4813.05665  |                     |    |                  | Not allowed               |
| M2a                                         | Selection          | $p_0=0.79009, p_1=0.15427, p_2=0.05564$<br>$\omega_0=0.07064, \omega_1=1, \omega_2=1$             | 4813.05665  | M1a VS M2a: 0       | 2  | 9.21             | None                      |
| M3                                          | Discrete           | $p_0=0.35383, p_1=0.43807, p_2=0.20810$<br>$\omega_0=0.00704, \omega_1=0.09464, \omega_2=0.44126$ | 4738.37109  | M0 VS M3: 381.08086 | 4  | 13.28            | None                      |
| M7                                          | $\beta$            | $p=0.44819, q=2.76153$                                                                            | 4740.65890  |                     |    |                  | Not allowed               |
| M8                                          | $\beta$ & $\omega$ | $p_0=0.99999, (p_1=0.00001), p=0.44819, q=2.76153$<br>$\omega=27.16606$                           | 4740.66047  | M7 VS M8: 0.00314   | 2  | 9.21             | None                      |

Positively selected sites were inferred based on posterior probabilities calculated by the method of Bayes Empirical Bayes as only implemented under the models of M2a and M8.
